# Supplementary material for: Quality Characteristics of Rice-Based Ice Creams with Different Amylose Contents
Source: MDPI journal article supplement (doi:10.3390/foods12071518), 2023-04-03
Supplement: s1 [file s1]

## Supplementary Materials

**Figure S1.** Distribution of amylose content of rice

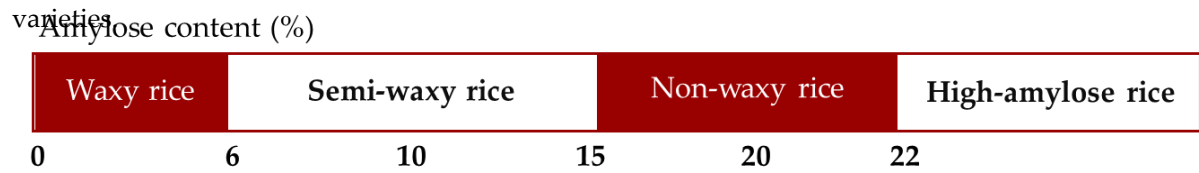

**Table S1.** Molecular genetics and general amylose content of processed rice.

| Variety    | Type                    | Cross                              | Marker name                      | Traits                             |
|------------|-------------------------|------------------------------------|----------------------------------|------------------------------------|
| Baegokchal | Japonica                | Dongjinchal//YR17334Acp24/Hwayeong | wx                               | Waxy                               |
| Miho       | Japonica                | Iksan480/Milky Princess            | wx-mq                            | Semi-waxy                          |
| Saeilmi    | Japonica                | Ilmi*5/Hwayeong                    | Wx                               | Non-waxy                           |
| Saemimyeon | Indica<br>(Tongil-type) | Milyang181//IR50/YR22791           | Wx <sup>a</sup> /Wx <sup>b</sup> | High-amylose                       |
| Dodamssal  | Japonica                | Goami/Goami2                       | GBSS1+SBE3                       | High-amylose +<br>Resistant starch |

**Table S2.** Proximate composition of processed rice.

| Variety    | Moisture<br>(%) | Crude protein<br>(g/100 g) | Crude fat<br>(g/100 g) | Carbohydrate<br>(g/100 g) | Crude ash<br>(%) |
|------------|-----------------|----------------------------|------------------------|---------------------------|------------------|
| Baegokchal | 7.34            | 6.84                       | 3.07                   | 82.29                     | 0.46             |
| Miho       | 6.99            | 6.99                       | 2.62                   | 83.01                     | 0.39             |
| Saeilmi    | 7.00            | 6.27                       | 2.72                   | 83.58                     | 0.42             |
| Saemimyeon | 8.56            | 7.55                       | 2.35                   | 81.29                     | 0.25             |
| Dodamssal  | 10.68           | 7.06                       | 3.73                   | 78.03                     | 0.50             |

**Table S3.** Mineral content of processed rice.

| (mass%)    |                         |                        |                        |                        |                        |                        |                        |                        |                        |
|------------|-------------------------|------------------------|------------------------|------------------------|------------------------|------------------------|------------------------|------------------------|------------------------|
| Variety    | Zn                      | Ca                     | P                      | K                      | Mg                     | Al                     | Si                     | S                      | Cl                     |
| Baegokchal | 0.00±0.00 <sup>a1</sup> | 0.01±0.00 <sup>a</sup> | 0.15±0.00 <sup>b</sup> | 0.22±0.00 <sup>a</sup> | 0.14±0.01 <sup>a</sup> | 0.01±0.00 <sup>a</sup> | 0.01±0.00 <sup>a</sup> | 0.08±0.00 <sup>d</sup> | 0.02±0.00 <sup>c</sup> |
| Miho       | 0.00±0.00 <sup>a</sup>  | 0.01±0.00 <sup>a</sup> | 0.13±0.00 <sup>c</sup> | 0.17±0.00 <sup>d</sup> | 0.12±0.00 <sup>b</sup> | 0.01±0.00 <sup>a</sup> | 0.01±0.00 <sup>a</sup> | 0.09±0.00 <sup>a</sup> | 0.02±0.00 <sup>c</sup> |
| Saeilmi    | 0.00±0.00 <sup>a</sup>  | 0.01±0.00 <sup>a</sup> | 0.10±0.00 <sup>d</sup> | 0.15±0.00 <sup>e</sup> | 0.09±0.00 <sup>c</sup> | 0.01±0.00 <sup>a</sup> | 0.01±0.00 <sup>a</sup> | 0.08±0.00 <sup>b</sup> | 0.03±0.00 <sup>a</sup> |
| Saemimyeon | 0.00±0.00 <sup>a</sup>  | 0.01±0.00 <sup>a</sup> | 0.15±0.00 <sup>b</sup> | 0.18±0.00 <sup>c</sup> | 0.13±0.00 <sup>a</sup> | 0.01±0.00 <sup>a</sup> | 0.01±0.00 <sup>a</sup> | 0.09±0.00 <sup>a</sup> | 0.03±0.00 <sup>b</sup> |
| Dodamssal  | 0.00±0.00 <sup>a</sup>  | 0.01±0.00 <sup>a</sup> | 0.15±0.00 <sup>a</sup> | 0.20±0.00 <sup>b</sup> | 0.14±0.00 <sup>a</sup> | 0.01±0.00 <sup>a</sup> | 0.01±0.00 <sup>a</sup> | 0.08±0.00 <sup>c</sup> | 0.02±0.00 <sup>d</sup> |
| Variety    | Fe                      | Cu                     | Mn                     | Ge                     | Se                     | Pb                     | Na                     | Ag                     | Au                     |
| Baegokchal | 0.00±0.00 <sup>a</sup>  | 0.00±0.00 <sup>a</sup> | 0.00±0.00 <sup>a</sup> | ND <sup>2</sup>        | ND                     | ND                     | ND                     | ND                     | ND                     |
| Miho       | 0.00±0.00 <sup>a</sup>  | 0.00±0.00 <sup>a</sup> | 0.00±0.00 <sup>a</sup> | ND                     | ND                     | ND                     | ND                     | ND                     | ND                     |
| Saeilmi    | 0.00±0.00 <sup>a</sup>  | 0.00±0.00 <sup>a</sup> | 0.00±0.00 <sup>a</sup> | ND                     | ND                     | ND                     | ND                     | ND                     | ND                     |
| Saemimyeon | 0.00±0.00 <sup>a</sup>  | 0.00±0.00 <sup>a</sup> | 0.00±0.00 <sup>a</sup> | ND                     | ND                     | ND                     | ND                     | ND                     | ND                     |
| Dodamssal  | 0.00±0.00 <sup>a</sup>  | 0.00±0.00 <sup>a</sup> | 0.00±0.00 <sup>a</sup> | ND                     | ND                     | ND                     | ND                     | ND                     | ND                     |

<sup>1</sup> Mean ± standard deviation (n=3) within each column followed by different letters are significantly different ( $p<0.05$ ).

<sup>2</sup> ND; not detected.
